# Supplementary material
Source: PubMed Central journal article supplement (PMC9269654)
Supplement: CJN.16171221SupplementaryData.pdf [file CJN.16171221SupplementaryData.pdf]

## **Supplemental Material**

### **Table of Contents**

**Supplemental Appendix A-** Record PE Checklist of Recommendations

**Supplemental Appendix B-** Descriptions of databases used to obtain demographic, comorbid condition and outcome data

**Supplemental Appendix C-** Codes used to obtain information about baseline measures and the databases used to obtain the information

**Supplemental Appendix D-** Drug Identification Numbers used to identify study drugs

**Supplemental Appendix E-** Codes used to define outcomes and references for validation

**Supplemental Appendix F-** Covariates used to create the propensity score

**Supplemental Appendix G-** Number of patients included at each step of the cohort build

**Supplemental Appendix H-** Full baseline characteristics for the weighted and unweighted cohorts

**Supplemental Appendix I-** Full baseline characteristics, stratified by eGFR category, after weighting

**Supplemental Appendix J-** Fracture at 180 days by fracture site

**Supplemental Appendix A- RECORD PE Statement**

| Item No                   | STROBE items                                                                                                                                                                                    | RECORD items                                                                                                                                                                                                                                                                                                                                                                                                  | RECORD-PE items                                                                                                                                         | Reported                          |
|---------------------------|-------------------------------------------------------------------------------------------------------------------------------------------------------------------------------------------------|---------------------------------------------------------------------------------------------------------------------------------------------------------------------------------------------------------------------------------------------------------------------------------------------------------------------------------------------------------------------------------------------------------------|---------------------------------------------------------------------------------------------------------------------------------------------------------|-----------------------------------|
| <b>Title and abstract</b> |                                                                                                                                                                                                 |                                                                                                                                                                                                                                                                                                                                                                                                               |                                                                                                                                                         |                                   |
| 1                         | (a) Indicate the study's design with a commonly used term in the title or the abstract.<br>(b) Provide in the abstract an informative and balanced summary of what was done and what was found. | 1.1: The type of data used should be specified in the title or abstract. When possible, the name of the databases used should be included.<br>1.2: If applicable, the geographical region and timeframe within which the study took place should be reported in the title or abstract. 1.3: If linkage between databases was conducted for the study, this should be clearly stated in the title or abstract. | —                                                                                                                                                       | Abstract                          |
| <b>Introduction</b>       |                                                                                                                                                                                                 |                                                                                                                                                                                                                                                                                                                                                                                                               |                                                                                                                                                         |                                   |
| Background rationale      |                                                                                                                                                                                                 |                                                                                                                                                                                                                                                                                                                                                                                                               |                                                                                                                                                         |                                   |
| 2                         | Explain the scientific background and rationale for the investigation being reported.                                                                                                           | —                                                                                                                                                                                                                                                                                                                                                                                                             | —                                                                                                                                                       | Introduction                      |
| Objectives                |                                                                                                                                                                                                 |                                                                                                                                                                                                                                                                                                                                                                                                               |                                                                                                                                                         |                                   |
| 3                         | State specific objectives, including any prespecified hypotheses.                                                                                                                               | —                                                                                                                                                                                                                                                                                                                                                                                                             | —                                                                                                                                                       | Introduction                      |
| <b>Methods</b>            |                                                                                                                                                                                                 |                                                                                                                                                                                                                                                                                                                                                                                                               |                                                                                                                                                         |                                   |
| Study design              |                                                                                                                                                                                                 |                                                                                                                                                                                                                                                                                                                                                                                                               |                                                                                                                                                         |                                   |
| 4                         | Present key elements of study design early in the paper.                                                                                                                                        | —                                                                                                                                                                                                                                                                                                                                                                                                             | 4.a: Include details of the specific study design (and its features) and report the use of multiple designs if used.<br>4.b: The use of a diagram(s) is | Methods: Study Design and Setting |

|              |                                                                                                                                                                                                                                                                                                                                                                                                                                             |                                                                                                                                                                                                                                                                                                                                                                                                                                                                                                                                                                                                                                                                      |                                                                                                                                                                                                                                                                                                                                                                                 |                                                          |
|--------------|---------------------------------------------------------------------------------------------------------------------------------------------------------------------------------------------------------------------------------------------------------------------------------------------------------------------------------------------------------------------------------------------------------------------------------------------|----------------------------------------------------------------------------------------------------------------------------------------------------------------------------------------------------------------------------------------------------------------------------------------------------------------------------------------------------------------------------------------------------------------------------------------------------------------------------------------------------------------------------------------------------------------------------------------------------------------------------------------------------------------------|---------------------------------------------------------------------------------------------------------------------------------------------------------------------------------------------------------------------------------------------------------------------------------------------------------------------------------------------------------------------------------|----------------------------------------------------------|
|              |                                                                                                                                                                                                                                                                                                                                                                                                                                             |                                                                                                                                                                                                                                                                                                                                                                                                                                                                                                                                                                                                                                                                      | recommended to illustrate key aspects of the study design(s), including exposure, washout, lag and observation periods, and covariate definitions as relevant.                                                                                                                                                                                                                  |                                                          |
| Setting      |                                                                                                                                                                                                                                                                                                                                                                                                                                             |                                                                                                                                                                                                                                                                                                                                                                                                                                                                                                                                                                                                                                                                      |                                                                                                                                                                                                                                                                                                                                                                                 |                                                          |
| 5            | Describe the setting, locations, and relevant dates, including periods of recruitment, exposure, follow-up, and data collection.                                                                                                                                                                                                                                                                                                            | —                                                                                                                                                                                                                                                                                                                                                                                                                                                                                                                                                                                                                                                                    | —                                                                                                                                                                                                                                                                                                                                                                               | Methods: Study Design and Setting                        |
| Participants |                                                                                                                                                                                                                                                                                                                                                                                                                                             |                                                                                                                                                                                                                                                                                                                                                                                                                                                                                                                                                                                                                                                                      |                                                                                                                                                                                                                                                                                                                                                                                 |                                                          |
| 6            | (a) Cohort study—give the eligibility criteria, and the sources and methods of selection of participants. Describe methods of follow-up. Case-control study—give the eligibility criteria, and the sources and methods of case ascertainment and control selection. Give the rationale for the choice of cases and controls. Cross sectional study—give the eligibility criteria, and the sources and methods of selection of participants. | 6.1: The methods of study population selection (such as codes or algorithms used to identify participants) should be listed in detail. If this is not possible, an explanation should be provided.<br>6.2: Any validation studies of the codes or algorithms used to select the population should be referenced. If validation was conducted for this study and not published elsewhere, detailed methods and results should be provided.<br>6.3: If the study involved linkage of databases, consider use of a flow diagram or other graphical display to demonstrate the data linkage process, including the number of individuals with linked data at each stage. | 6.1.a: Describe the study entry criteria and the order in which these criteria were applied to identify the study population. Specify whether only users with a specific indication were included and whether patients were allowed to enter the study population once or if multiple entries were permitted. See explanatory document for guidance related to matched designs. | Methods: Population<br><br>Supplemental Appendix D and G |

|           |                                                                                                                                                                                                       |                                                                                                                                                                                                          |                                                                                                                                                                                                                                                                                                                                                                                                                                                                                                                                                                                                                                  |                                                                                                        |
|-----------|-------------------------------------------------------------------------------------------------------------------------------------------------------------------------------------------------------|----------------------------------------------------------------------------------------------------------------------------------------------------------------------------------------------------------|----------------------------------------------------------------------------------------------------------------------------------------------------------------------------------------------------------------------------------------------------------------------------------------------------------------------------------------------------------------------------------------------------------------------------------------------------------------------------------------------------------------------------------------------------------------------------------------------------------------------------------|--------------------------------------------------------------------------------------------------------|
|           | (b) Cohort study—for matched studies, give matching criteria and number of exposed and unexposed. Case-control study—for matched studies, give matching criteria and the number of controls per case. |                                                                                                                                                                                                          |                                                                                                                                                                                                                                                                                                                                                                                                                                                                                                                                                                                                                                  |                                                                                                        |
| Variables |                                                                                                                                                                                                       |                                                                                                                                                                                                          |                                                                                                                                                                                                                                                                                                                                                                                                                                                                                                                                                                                                                                  |                                                                                                        |
| 7         | Clearly define all outcomes, exposures, predictors, potential confounders, and effect modifiers. Give diagnostic criteria, if applicable.                                                             | 7.1: A complete list of codes and algorithms used to classify exposures, outcomes, confounders, and effect modifiers should be provided. If these cannot be reported, an explanation should be provided. | 7.1.a: Describe how the drug exposure definition was developed.<br>7.1.b: Specify the data sources from which drug exposure information for individuals was obtained.<br>7.1.c: Describe the time window(s) during which an individual is considered exposed to the drug(s). The rationale for selecting a particular time window should be provided. The extent of potential left truncation or left censoring should be specified.<br>7.1.d: Justify how events are attributed to current, prior, ever, or cumulative drug exposure.<br>7.1.e: When examining drug dose and risk attribution, describe how current, historical | Methods: Population, Patient Characteristics, and Outcomes<br><br>Supplemental Appendices: C, D, and E |

|                          |                                                                                                                                                                                       |   |                                                                                                                                                                                                                                                         |                                                                                                                                |
|--------------------------|---------------------------------------------------------------------------------------------------------------------------------------------------------------------------------------|---|---------------------------------------------------------------------------------------------------------------------------------------------------------------------------------------------------------------------------------------------------------|--------------------------------------------------------------------------------------------------------------------------------|
|                          |                                                                                                                                                                                       |   | <p>or time on therapy are considered.</p> <p>7.1.f: Use of any comparator groups should be outlined and justified.</p> <p>7.1.g: Outline the approach used to handle individuals with more than one relevant drug exposure during the study period.</p> |                                                                                                                                |
| Data sources/measurement |                                                                                                                                                                                       |   |                                                                                                                                                                                                                                                         |                                                                                                                                |
| 8                        | For each variable of interest, give sources of data and details of methods of assessment (measurement). Describe comparability of assessment methods if there is more than one group. |   | 8.a: Describe the healthcare system and mechanisms for generating the drug exposure records. Specify the care setting in which the drug(s) of interest was prescribed.                                                                                  | <p>Methods: Data Sources, Population, Patient Characteristics, and Outcomes</p> <p>Supplemental Appendices: B, C, D, and E</p> |
| Bias                     |                                                                                                                                                                                       |   |                                                                                                                                                                                                                                                         |                                                                                                                                |
| 9                        | Describe any efforts to address potential sources of bias.                                                                                                                            | — | —                                                                                                                                                                                                                                                       | Methods: Statistical Analysis                                                                                                  |
| Study size               |                                                                                                                                                                                       |   |                                                                                                                                                                                                                                                         |                                                                                                                                |
| 10                       | Explain how the study size was arrived at.                                                                                                                                            | — | —                                                                                                                                                                                                                                                       | <p>Results</p> <p>Supplemental Appendix G</p>                                                                                  |
| Quantitative variables   |                                                                                                                                                                                       |   |                                                                                                                                                                                                                                                         |                                                                                                                                |
| 11                       | Explain how quantitative variables were handled in the analyses. If applicable,                                                                                                       | — | —                                                                                                                                                                                                                                                       | Methods: Statistical Analysis                                                                                                  |

|                                  |                                                                                                                                                                                                                                                                                                                                                                                                                                                                                                                                                                   |                                                                                                                                                                                                                                                       |                                                                                                                                                                                                         |                                                                                                  |
|----------------------------------|-------------------------------------------------------------------------------------------------------------------------------------------------------------------------------------------------------------------------------------------------------------------------------------------------------------------------------------------------------------------------------------------------------------------------------------------------------------------------------------------------------------------------------------------------------------------|-------------------------------------------------------------------------------------------------------------------------------------------------------------------------------------------------------------------------------------------------------|---------------------------------------------------------------------------------------------------------------------------------------------------------------------------------------------------------|--------------------------------------------------------------------------------------------------|
|                                  | describe which groupings were chosen, and why.                                                                                                                                                                                                                                                                                                                                                                                                                                                                                                                    |                                                                                                                                                                                                                                                       |                                                                                                                                                                                                         |                                                                                                  |
| Statistical methods              |                                                                                                                                                                                                                                                                                                                                                                                                                                                                                                                                                                   |                                                                                                                                                                                                                                                       |                                                                                                                                                                                                         |                                                                                                  |
|                                  | <p>(a) Describe all statistical methods, including those used to control for confounding.</p> <p>(b) Describe any methods used to examine subgroups and interactions.</p> <p>(c) Explain how missing data were addressed.</p> <p>(d) Cohort study—if applicable, explain how loss to follow-up was addressed. Case-control study—if applicable, explain how matching of cases and controls was addressed. Cross sectional study—if applicable, describe analytical methods taking account of sampling strategy.</p> <p>(e) Describe any sensitivity analyses.</p> | —                                                                                                                                                                                                                                                     | <p>12.1.a: Describe the methods used to evaluate whether the assumptions have been met.</p> <p>12.1.b: Describe and justify the use of multiple designs, design features, or analytical approaches.</p> | Methods: Statistical Analysis                                                                    |
| Data access and cleaning methods |                                                                                                                                                                                                                                                                                                                                                                                                                                                                                                                                                                   |                                                                                                                                                                                                                                                       |                                                                                                                                                                                                         |                                                                                                  |
| 12                               | —                                                                                                                                                                                                                                                                                                                                                                                                                                                                                                                                                                 | <p>12.1: Authors should describe the extent to which the investigators had access to the database population used to create the study population.</p> <p>12.2: Authors should provide information on the data cleaning methods used in the study.</p> | —                                                                                                                                                                                                       | <p>Methods: Population, and Data Sources</p> <p>Data access/access to data analysis protocol</p> |
| Linkage                          |                                                                                                                                                                                                                                                                                                                                                                                                                                                                                                                                                                   |                                                                                                                                                                                                                                                       |                                                                                                                                                                                                         |                                                                                                  |

|                  |                                                                                                                                                                                                                                                                                                                 |                                                                                                                                                                                                                                                                                                            |   |                                                                |
|------------------|-----------------------------------------------------------------------------------------------------------------------------------------------------------------------------------------------------------------------------------------------------------------------------------------------------------------|------------------------------------------------------------------------------------------------------------------------------------------------------------------------------------------------------------------------------------------------------------------------------------------------------------|---|----------------------------------------------------------------|
| 12               | —                                                                                                                                                                                                                                                                                                               | 12.3: State whether the study included person level, institutional level, or other data linkage across two or more databases. The methods of linkage and methods of linkage quality evaluation should be provided.                                                                                         | — | Methods: Data Sources                                          |
| <b>Results</b>   |                                                                                                                                                                                                                                                                                                                 |                                                                                                                                                                                                                                                                                                            |   |                                                                |
| Participants     |                                                                                                                                                                                                                                                                                                                 |                                                                                                                                                                                                                                                                                                            |   |                                                                |
| 13               | (a) Report the numbers of individuals at each stage of the study (e.g., numbers potentially eligible, examined for eligibility, confirmed eligible, included in the study, completing follow-up, and analysed).<br>(b) Give reasons for non-participation at each stage.<br>(c) Consider use of a flow diagram. | 13.1: Describe in detail the selection of the individuals included in the study (that is, study population selection) including filtering based on data quality, data availability, and linkage. The selection of included individuals can be described in the text or by means of the study flow diagram. | — | Results<br><br>Supplemental Appendix G                         |
| Descriptive data |                                                                                                                                                                                                                                                                                                                 |                                                                                                                                                                                                                                                                                                            |   |                                                                |
| 14               | (a) Give characteristics of study participants (e.g., demographic, clinical, social) and information on exposures and potential confounders.<br>(b) Indicate the number of participants with missing data for each variable of interest.<br>(c) Cohort study—summarise follow-up time                           | —                                                                                                                                                                                                                                                                                                          | — | Results<br><br>Table 1<br><br>Supplemental Appendices: H and I |

|              |                                                                                                                                                                                                                                                                                                                                                                                                                                   |   |   |                                                              |
|--------------|-----------------------------------------------------------------------------------------------------------------------------------------------------------------------------------------------------------------------------------------------------------------------------------------------------------------------------------------------------------------------------------------------------------------------------------|---|---|--------------------------------------------------------------|
|              | (e.g., average and total amount).                                                                                                                                                                                                                                                                                                                                                                                                 |   |   |                                                              |
| Outcome data |                                                                                                                                                                                                                                                                                                                                                                                                                                   |   |   |                                                              |
| 15           | <p>Cohort study—report numbers of outcome events or summary measures over time.</p> <p>Case-control study—report numbers in each exposure category, or summary measures of exposure.</p> <p>Cross sectional study—report numbers of outcome events or summary measures.</p>                                                                                                                                                       | — | — | <p>Results</p> <p>Table 3</p>                                |
| Main results |                                                                                                                                                                                                                                                                                                                                                                                                                                   |   |   |                                                              |
| 16           | <p>(a) Give unadjusted estimates and, if applicable, confounder adjusted estimates and their precision (e.g., 95% confidence intervals). Make clear which confounders were adjusted for and why they were included.</p> <p>(b) Report category boundaries when continuous variables are categorised.</p> <p>(c) If relevant, consider translating estimates of relative risk into absolute risk for a meaningful time period.</p> | — | — | <p>Results</p> <p>Table 3</p> <p>Supplemental Appendix F</p> |



|                          |                                                                                                                                                                             |                                                                                                                                                                                                                                                                                                   |                                                                                                                                                                                                                    |                        |
|--------------------------|-----------------------------------------------------------------------------------------------------------------------------------------------------------------------------|---------------------------------------------------------------------------------------------------------------------------------------------------------------------------------------------------------------------------------------------------------------------------------------------------|--------------------------------------------------------------------------------------------------------------------------------------------------------------------------------------------------------------------|------------------------|
| <b>Other analyses</b>    |                                                                                                                                                                             |                                                                                                                                                                                                                                                                                                   |                                                                                                                                                                                                                    |                        |
| 17                       | Report other analyses done—e.g., analyses of subgroups and interactions, and sensitivity analyses.                                                                          | —                                                                                                                                                                                                                                                                                                 | —                                                                                                                                                                                                                  | Results<br><br>Table 4 |
| <b>Discussion</b>        |                                                                                                                                                                             |                                                                                                                                                                                                                                                                                                   |                                                                                                                                                                                                                    |                        |
| Key results              |                                                                                                                                                                             |                                                                                                                                                                                                                                                                                                   |                                                                                                                                                                                                                    |                        |
| 18                       | Summarise key results with reference to study objectives.                                                                                                                   | —                                                                                                                                                                                                                                                                                                 | —                                                                                                                                                                                                                  | Discussion             |
| Limitations              |                                                                                                                                                                             |                                                                                                                                                                                                                                                                                                   |                                                                                                                                                                                                                    |                        |
| 19                       | Discuss limitations of the study, taking into account sources of potential bias or imprecision. Discuss both direction and magnitude of any potential bias.                 | 19.1: Discuss the implications of using data that were not created or collected to answer the specific research question(s). Include discussion of misclassification bias, unmeasured confounding, missing data, and changing eligibility over time, as they pertain to the study being reported. | 19.1.a: Describe the degree to which the chosen database(s) adequately captures the drug exposure(s) of interest.                                                                                                  | Discussion             |
| Interpretation           |                                                                                                                                                                             |                                                                                                                                                                                                                                                                                                   |                                                                                                                                                                                                                    |                        |
| 20                       | Give a cautious overall interpretation of results considering objectives, limitations, multiplicity of analyses, results from similar studies, and other relevant evidence. | —                                                                                                                                                                                                                                                                                                 | 20.a: Discuss the potential for confounding by indication, contraindication or disease severity or selection bias (healthy adherer/sick stopper) as alternative explanations for the study findings when relevant. | Conclusion             |
| Generalisability         |                                                                                                                                                                             |                                                                                                                                                                                                                                                                                                   |                                                                                                                                                                                                                    |                        |
| 21                       | Discuss the generalisability (external validity) of the study results.                                                                                                      | —                                                                                                                                                                                                                                                                                                 | —                                                                                                                                                                                                                  | Discussion             |
| <b>Other information</b> |                                                                                                                                                                             |                                                                                                                                                                                                                                                                                                   |                                                                                                                                                                                                                    |                        |
| Funding                  |                                                                                                                                                                             |                                                                                                                                                                                                                                                                                                   |                                                                                                                                                                                                                    |                        |

|                                                           |                                                                                                                                                                |                                                                                                                                                   |   |                                              |
|-----------------------------------------------------------|----------------------------------------------------------------------------------------------------------------------------------------------------------------|---------------------------------------------------------------------------------------------------------------------------------------------------|---|----------------------------------------------|
| 22                                                        | Give the source of funding and the role of the funders for the present study and, if applicable, for the original study on which the present article is based. | —                                                                                                                                                 | — | Funding                                      |
| Accessibility of protocol, raw data, and programming code |                                                                                                                                                                |                                                                                                                                                   |   |                                              |
| 22                                                        | —                                                                                                                                                              | 22.1: Authors should provide information on how to access any supplemental information such as the study protocol, raw data, or programming code. | — | Data access/access to data analysis protocol |

\*REFERENCE: Langan SM, Schmidt S, Wing K, Ehrenstein V, Nicholls S, Filion K, Klungel O, Petersen I, Sorensen H, Guttman A, Harron K, Hemkens L, Moher D, Schneeweiss S, Smeeth L, Sturkenboom M, von Elm E, Wang S, Benchimol EI. The REporting of studies Conducted using Observational



| Database                                                                                               | Description                                                                                                                                                   |
|--------------------------------------------------------------------------------------------------------|---------------------------------------------------------------------------------------------------------------------------------------------------------------|
| Canadian Institute for Health Information Discharge Abstract Database/ Same Day Surgery (CIHI-DAD/SDS) | Diagnostic and procedural information for all hospitalizations and same day surgeries.                                                                        |
| Ontario Lab Information System (OLIS)                                                                  | Laboratory test orders and results from hospitals, community labs, and public health labs.                                                                    |
| ICES-derived Physician Database (IPDB)                                                                 | Physician related information such as birth date, sex, education, and specializations.                                                                        |
| Canadian Institute for Health Information National Ambulatory Care Reporting System (NACRS)            | Information on emergency department visits.                                                                                                                   |
| Ontario Drug Benefit (ODB)                                                                             | Highly accurate records of all dispensed outpatient prescriptions covered through the Ontario Drug Benefit program, including domperidone and metoclopramide. |
| Ontario Health Insurance Plan (OHIP)                                                                   | Diagnostic information and health claims for inpatient and outpatient physician services.                                                                     |
| Office of the Registrar General-Deaths (ORDG)                                                          | Cause of death information extracted from death certificates                                                                                                  |
| Registered Persons Database (RPDB)                                                                     | Information on vital patient statistics including sex, birth and death dates for all residents who have been issued a health card                             |

**Supplemental Appendix B- Descriptions of databases used to obtain demographic, comorbid condition and outcome data**

| Variable                                              | Database                  | Codes Used                                                                                                                                                  |
|-------------------------------------------------------|---------------------------|-------------------------------------------------------------------------------------------------------------------------------------------------------------|
| Age                                                   | RPDB                      |                                                                                                                                                             |
| Sex                                                   | RPDB                      |                                                                                                                                                             |
| Location of residence- rural status                   | RPDB                      | RURAL                                                                                                                                                       |
| Socioeconomic status (neighbourhood income quintiles) | RPDB                      | INCQUINT                                                                                                                                                    |
| Index Year                                            | ODB                       |                                                                                                                                                             |
| Residential Status- Long term care                    | ODB                       | LTC=1                                                                                                                                                       |
| Prescribing physician                                 | IPDB                      | MAINSPECIALTY                                                                                                                                               |
| Duration of Diabetes                                  | CIHI-DAD<br>OHIP          | OHIP Feecode: K045, K046, K029 K030, Q040<br>OHIP Diagnostic Code: 250<br>ICD10: E10, E11, E13, E14<br>ODD: Diagdate-index date                             |
| Fragility Fracture                                    | CIHI DAD<br>NACRS<br>OHIP | ICD10: S720, S721, S722, S220, S221, S320, S327, S328, S422, S520-S529, S321, S323-S328<br>OHIP Diagnostic code: 805, 808, 812, 813                         |
| Previous fall                                         | CIHI-DAD<br>NACRS         | S220, S221, S320, S327, S328<br>OHIP Diagnostic code: 805                                                                                                   |
| Major cancer                                          | CIHI-DAD<br>OHIP          | ICD10: S422<br>OHIP Diagnostic Code: 812                                                                                                                    |
| Dementia                                              | CIHI-DAD<br>OHIP          | ICD10: S520-S529<br>OHIP Diagnostic Code: 813                                                                                                               |
| Rheumatoid arthritis                                  | CIHI-DAD<br>OHIP          | S321, S323-S328<br>OHIP Diagnostic Code: 808                                                                                                                |
| Osteoporosis                                          | CIHI-DAD<br>OHIP          | OHIP Diagnostic Code: 733<br>ICD10 M80-M82                                                                                                                  |
| Hypertension                                          | CIHI-DAD<br>OHIP          | OHIP Diagnostic Code: 401-405<br>ICD10: I10-13, I15<br>HYPERTENSION: DIAGATE                                                                                |
| Hypotension                                           | CIHI-DAD                  | ICD10: I95                                                                                                                                                  |
| Coronary artery disease (excluding angina)            | CIHI-DAD<br>OHIP          | OHIP Feecode: R741-743, G298, E646, E651, E652, E654, E655, Z434, Z448<br>OHIP Diagnostic Coe: 410, 412<br>ICD10: I21, I22, Z955, T822<br>CCI: 1IJ50, 1IJ76 |
| Arrhythmia                                            | CIHI-DAD<br>OHIP          | OHIP Feecode: G178, G179, G249, G259, G261, Z431, Z437, Z443                                                                                                |

|                                                           |                           |                                                                                                                                                                                                                                                                                                                                                |
|-----------------------------------------------------------|---------------------------|------------------------------------------------------------------------------------------------------------------------------------------------------------------------------------------------------------------------------------------------------------------------------------------------------------------------------------------------|
|                                                           |                           | ICD10: I44, I45, I47, I48, I4900, I4901, I491-I494, I498, I499, R000, R001                                                                                                                                                                                                                                                                     |
| Diabetic retinopathy                                      | CIHI-DAD                  | ICD10: E1030-E1033, E1130-E1133, E1330-E1333, E1430-E1433, H360                                                                                                                                                                                                                                                                                |
| Diabetic neuropathy                                       | CIHI-DAD                  | ICD10: E1040-1042, E1048, E1049, E1440-E1442, E1448, E1140-E1242, E1148, E1340-E1342, E1348, G590, G632, G990                                                                                                                                                                                                                                  |
| Hypoglycemia                                              | CIHI-DAD<br>NACRS         | ICD10: E15, E160-E162, E1063, E1163, E1363, E1463                                                                                                                                                                                                                                                                                              |
| Peripheral vascular disease                               | CIHI-DAD<br>OHIP          | OHIP Feecode: R787, R780, R797, R804, R809, R875, R815, R936, R783-R785, E626, R814, R786, R937, R860, R861, R855, R856, R933, R934, R791, E672, R794, R813, R867, E649<br>ICD10: I700, I702, I708, I709, I731, 1738, I739, K551<br>CCI: 1KA76, 1KA50, 1KE76, 1KG50, 1KG57, 1KG76MI, 1KG87, 1IA87LA, 1IB87LA, 1IC87LA, 1ID87LA, 1KA87LA, 1KE57 |
| Liver disease                                             | CIHI-DAD<br>OHIP          | OHIP Feecode: Z551, Z554<br>OHIP Dx Code: 571, 573, 070<br>ICD10: B16-19, I85, R17, R18, R160, R162, B942, Z225, E831, E830, K70, K713-K715, K717, K721, K729, K73, K74, K753, K754, K758, K759, K76, K77                                                                                                                                      |
| COPD                                                      | CIHI-DAD<br>COPD          | ICD10: J41, J43, J44<br>COPD DIAGDATE                                                                                                                                                                                                                                                                                                          |
| CHF                                                       | CIHI-DAD<br>OHIP<br>CHF   | OHIP Diagnostic Code: 428<br>ICD10: I500, I501, I509<br>DIAGDATE                                                                                                                                                                                                                                                                               |
| Hypothyroidism                                            | CIHI-DAD                  | ICD10: E00, E01, E02, E03, E890                                                                                                                                                                                                                                                                                                                |
| Disorder of calcium metabolism/dietary calcium deficiency | CIHI-DAD                  | ICD10: E58, E835                                                                                                                                                                                                                                                                                                                               |
| Stroke/TIA                                                | CIHI-DAD<br>OHIP<br>NACRS | OHIP diagnostic Code: 436, 432, 435<br>ICD10: I60, I61, I600-I619, I630-I635, I638, I639, I64, H342, G450-G453, G459, H340                                                                                                                                                                                                                     |
| Syncope                                                   | CIHI-DAD                  | ICD10: R55                                                                                                                                                                                                                                                                                                                                     |
| Alcohol misuse                                            | CIHI-DAD                  | ICD10: E244, E512, E52, F10, G312, G621, G721, I426, K292, K70, K860, T51, X45, X65, Y15, Y573, Z502, Z714, Z721                                                                                                                                                                                                                               |
| Medication Use                                            | ODB                       |                                                                                                                                                                                                                                                                                                                                                |
| Hemoglobin A1C                                            | OLIS                      | OBSERVATIONCODE: 4548-4, 71875-9, 59261-8, 17855-8, 17856-6, 41995-2                                                                                                                                                                                                                                                                           |
| ACR (mg/mmol)                                             | OLIS                      | OBSERVATIONCODE: 14959-1, 30000-1, 32294-1, XON10383-8, XON12394-3                                                                                                                                                                                                                                                                             |
| Diabetes management                                       | OLIS<br>OHIP              | OHIP Feecode: K030, Q040, K045, K046<br>OHIP Diagnostic code: K046                                                                                                                                                                                                                                                                             |
| GP/FP visits                                              | IPDB                      | Mainspeciality = "GP/FP" or "F.P./EMERGENCY MEDICINE"                                                                                                                                                                                                                                                                                          |
| Nephrologist visit                                        | IPDB<br>OHIP              | Mainspecialty = "NEPHROLOGY"<br>OR OHIP Feecode: A160, A161, A163-A166, A168, A865, C160-C167, C169, C865, W165, W160-W166, W168, W865, W862, W864, W867, W869,                                                                                                                                                                                |

|                                   |                  |                                                                                                                                                                                 |
|-----------------------------------|------------------|---------------------------------------------------------------------------------------------------------------------------------------------------------------------------------|
| Orthopedist visit                 | IPDB             | Mainspecialty= "ORTHOPEDIC SURGERY"                                                                                                                                             |
| Endocrinologist visit             | IPDB             | Mainspecialty = "ENDOCRINOLOGY"                                                                                                                                                 |
| Internist visit                   | IPDB             | Mainspeciality = "INTERNAL MEDICINE"                                                                                                                                            |
| Geriatrician visit                | IPDB             | Mainspecialty = "GERIATRIC MEDICINE"                                                                                                                                            |
| Ophthalmologist visit             | IPDB             | Mainspecialty= "OTHALMOLOGY"                                                                                                                                                    |
| episodes of care                  | CIHI-DAD         | ADMDATE, DDATE, EPI, EPIFLAG, EPIVISIT                                                                                                                                          |
| ER visits                         | NACRS            | "regdate"                                                                                                                                                                       |
| Laboratory calcium test           | OLIS<br>OHIP     | OHIP FEECODE: L045, L046<br>OBSERVATIONCODE: 29265-6, 1995-0, 19072-8, 1994-3, 47598-8, 34581-9, 59473-9, 41645-3, 12180-6, 13959-2, 47596-2, 53140-0, 41644-6, 53139-2, 3000-9 |
| Laboratory serum creatinine tests | OHIP             | OHIP feecode: L065, L067, L068                                                                                                                                                  |
| CT scan                           | OHIP             | OHIP Feecode: X126, X188, X400-X410, X124, X231-X233, X128, X415, X416                                                                                                          |
| Carotid ultrasound                | OHIP<br>CIHI-DAD | OHIP Feecode: J201, J501, J190, J490<br>CCI: 3JE30, 3JG30                                                                                                                       |
| Echocardiography                  | OHIP<br>CIHI-DAD | OHIP Feecode: G560-G562, G566-G568, G570-G572, G574-G578, G581<br>CCI: 3IP30                                                                                                    |
| Cardiac stress test               | OHIP<br>CIHI DAD | OHIP Feecode: G315, G174, G112, G112, G319, G582, G583, G584, J604, J606-J609, J611-J613, J667, J807- J809, J804, J811-J813, J867, J666, J866<br>CCI: 2HZ08, 3IP70              |
| Bone mineral density test         | OHIP             | OHIP Feecode: J654, J688, J854, J888, X149, X152, X153, X155, Y654, Y688, Y854, Y888                                                                                            |
| Chest x-ray                       | OHIP             | OHIP Feecode: X090, X091, X092, X195                                                                                                                                            |
| Pulmonary function test           | OHIP             | OHIP Feecode: J301, J303-J311, J313, J315-J320, J322-J324, J327, J328, J330-J335, J340, J341, E450, E451                                                                        |

**Supplemental Appendix C- Codes used to obtain information about baseline measures and the databases used to obtain the information**

RPDB: Registered Persons Database, ODB: Ontario Drug Benefit, IPDB: ICES Physician Database, CIHI-DAD: Canadian Institute of Health Information Discharge Abstract Database, OHIP: Ontario Health Insurance Plan, NACRS: National Ambulatory Care Reporting System, OLIS: Ontario Lab Information Services,

| <b>Medication</b> | <b>Drug Identification Numbers included</b>                                                 |
|-------------------|---------------------------------------------------------------------------------------------|
| Canagliflozin     | 2425483, 2425491                                                                            |
| Dapagliflozin     | 2435462, 2435470<br>With Metformin: 2449935, 2449943                                        |
| Empagliflozin     | 2443937, 2443945<br>With Metformin: 2456575, 2456583, 2456591,<br>2456605, 2456613, 2456621 |
| Linagliptin       | 2370921<br>With Metformin: 2403250, 2403269, 2403277                                        |
| Sitagliptin       | 2388839, 2388847, 2303922<br>With Metformin: 2333856, 2333864, 2333872                      |
| Saxagliptin       | 2403250, 2403269, 2403277<br>With Metformin: 2389169, 2389177, 2389185                      |

**Supplemental Appendix D- Drug Identification Numbers used to identify study drugs**



| Outcome      |                        | Database Used                  | Codes Used                                                |
|--------------|------------------------|--------------------------------|-----------------------------------------------------------|
| Fracture     | Hip                    | CIHI DAD                       | ICD10: S720, S721, S722                                   |
|              | Spine                  | CIHI DAD<br>CIHI NACRS<br>OHIP | S220, S221, S320, S327, S328<br>OHIP Diagnostic code: 805 |
|              | Shoulder and Upper Arm | CIHI DAD,<br>NACRS<br>OHIP     | ICD10: S422<br>OHIP Diagnostic Code: 812                  |
|              | Wrist and Forearm      | CIHI DAD<br>NACRS<br>OHIP      | ICD10: S520-S529<br>OHIP Diagnostic Code: 813             |
|              | Pelvic                 | CIHI DAD<br>NACRS<br>OHIP      | S321, S323-S328<br>OHIP Diagnostic Code: 808              |
| Hypoglycemia |                        | CIHI- DAD<br>NACRS             | ICD10: E15, E160, E161, E162, E1063, E1163, E1363, E1463  |
| Falls        |                        | CIHI-DAD                       | ICD10: W00-W19                                            |
| Hypotension  |                        | CIHI-DAD                       | ICD10: I95                                                |

**Supplemental Appendix E- Codes used to define study outcomes**

|                         |                                                                                                                                                                                                                                                                                                                                                                                                                                                |
|-------------------------|------------------------------------------------------------------------------------------------------------------------------------------------------------------------------------------------------------------------------------------------------------------------------------------------------------------------------------------------------------------------------------------------------------------------------------------------|
| Demographics            | Age, Sex, Income quintile, Rurality, Residential status – Long-term care, Prescriber                                                                                                                                                                                                                                                                                                                                                           |
| Comorbidities           | Charlson comorbidity index, duration of diabetes, fragility fracture, previous fall, major cancer, dementia, rheumatoid arthritis, osteoporosis, hypertension, hypotension, coronary artery disease, arrhythmia, diabetic retinopathy, diabetic neuropathy, hypoglycemia, peripheral vascular disease, liver disease, COPD CHF, hypothyroidism, disorder of calcium metabolism/dietary calcium deficiency, stroke/TIA, syncope, alcohol misuse |
| Medication Use          | Number of unique drug names, bisphosphonates, denosumab, oral steroid, estrogen, proton pump inhibitors, loop diuretics, potassium-sparing diuretics, thiazide diuretics, beta blockers, opiates, antidepressants, antipsychotics, testosterone, number of unique oral hypoglycemic agents used, Acarbose, gliclazide, glyburide, metformin, thiazolidinedione                                                                                 |
| Health Care Utilization | Diabetes management, GP/FP visits, nephrologist visit, orthopedist visit, endocrinologist visit, internist visit, geriatrician visit, ophthalmologist visit, number of episodes of care, number of ER visits                                                                                                                                                                                                                                   |
| Investigations          | Hemoglobin A1C, ACR, laboratory calcium testing, laboratory serum creatinine testing, CT scan, carotid ultrasound, echocardiography, cardiac stress test, bone mineral density test, chest x-ray, pulmonary function test                                                                                                                                                                                                                      |

**Supplemental Appendix F- Covariates used to create the propensity score**

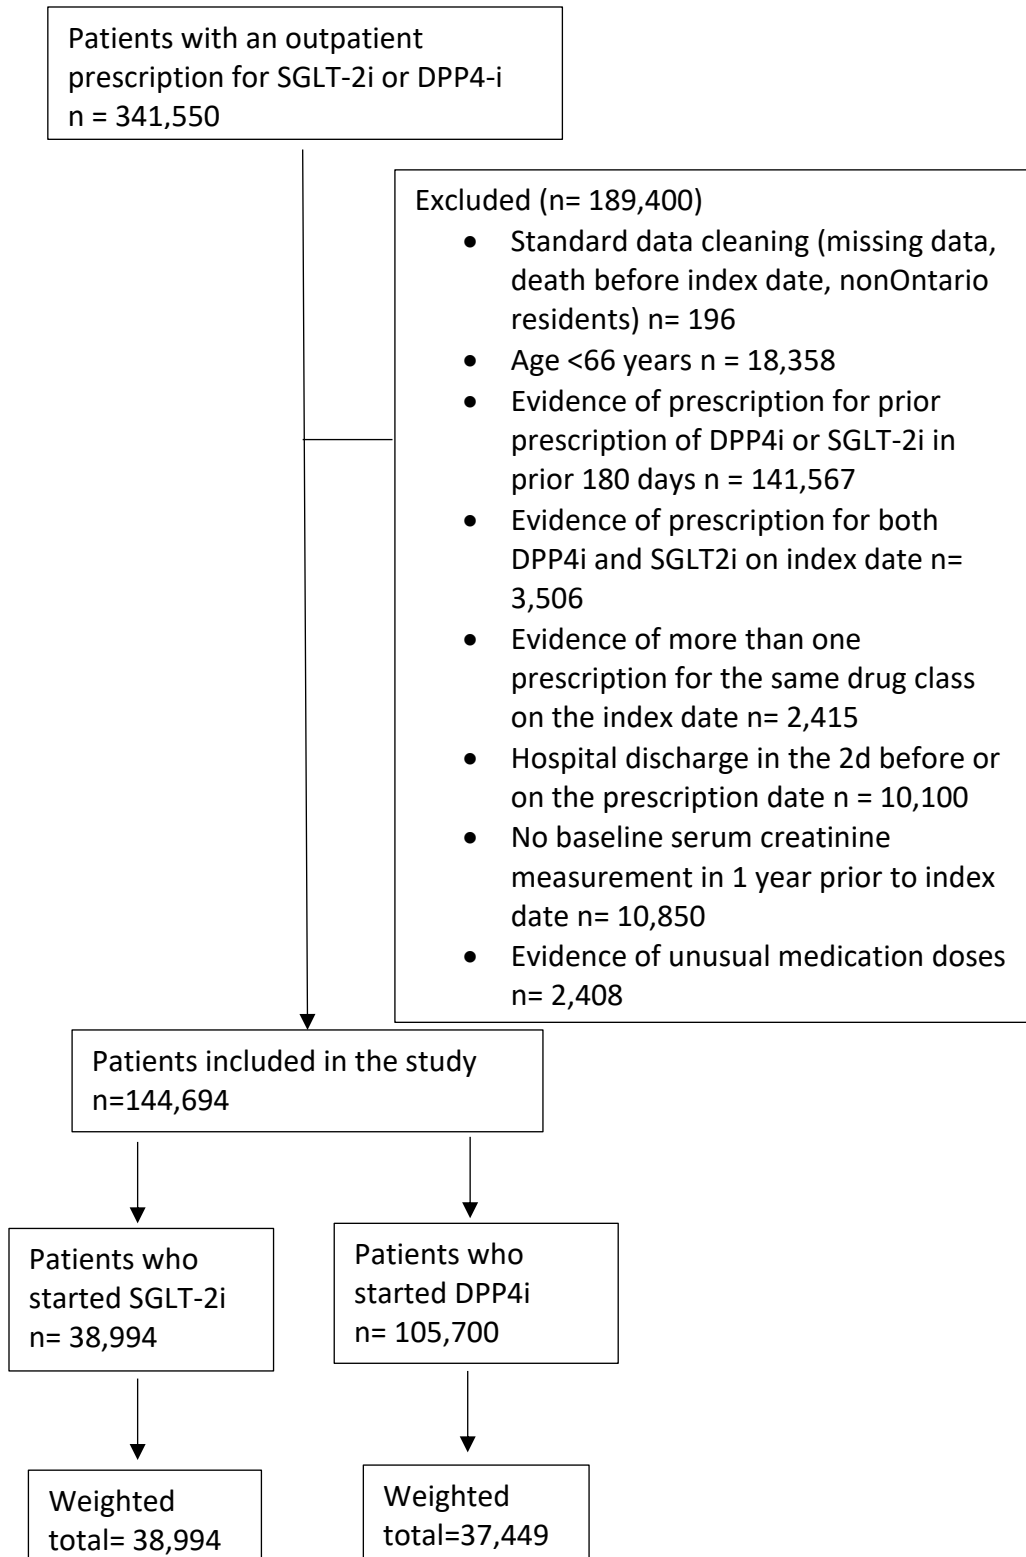

**Supplemental Appendix G- Study flow diagram of older adults with a new prescription for SGLT-2i or DPP-4i**

| Variable                      | Unweighted (N=144,694)      |                             |                            | Weighted (N=76,443)        |                             |                            |
|-------------------------------|-----------------------------|-----------------------------|----------------------------|----------------------------|-----------------------------|----------------------------|
|                               | DPP-4i users<br>(N=105,700) | SGLT-2i users<br>(N=38,994) | Standardized<br>Difference | DPP-4i users<br>(N=37,449) | SGLT-2i users<br>(N=38,994) | Standardized<br>Difference |
| <b>Demographics</b>           |                             |                             |                            |                            |                             |                            |
| Age, mean, y (SD)             | 74 (7)                      | 72 (5)                      | 0.38                       | 72 (3)                     | 72 (5)                      | 0.00                       |
| Female No. (%)                | 49,289 (47)                 | 15,457 (40)                 | 0.14                       | 15,258 (41)                | 15,457 (40)                 | 0.02                       |
| Income Quintile No. (%)       |                             |                             |                            |                            |                             |                            |
| 1                             | 24,747 (23)                 | 8,257 (21)                  | 0.05                       | 8,062 (22)                 | 8,257 (21)                  | 0.01                       |
| 2                             | 23,603 (22)                 | 8,383 (22)                  | 0.02                       | 8,042 (22)                 | 8,383 (22)                  | 0.00                       |
| 3                             | 21,946 (21)                 | 8,109 (21)                  | 0.00                       | 7,815 (21)                 | 8,109 (21)                  | 0.00                       |
| 4                             | 18,758 (18)                 | 7,405 (19)                  | 0.03                       | 7,033 (19)                 | 7,405 (19)                  | 0.01                       |
| 5                             | 16,646 (16)                 | 6,840 (18)                  | 0.05                       | 6,497 (17)                 | 6,840 (18)                  | 0.00                       |
| Rurality No. (%)              | 10,947 (10)                 | 6,167 (16)                  | 0.16                       | 5,935 (16)                 | 6,167 (16)                  | 0.00                       |
| Index year                    |                             |                             |                            |                            |                             |                            |
| 2015                          | 14,152 (13)                 | 3,770 (10)                  | 0.12                       | 3,698 (10)                 | 3,770 (10)                  | 0.01                       |
| 2016                          | 28,596 (27)                 | 6,804 (17)                  | 0.23                       | 6,679 (18)                 | 6,804 (17)                  | 0.01                       |
| 2017                          | 24,459 (23)                 | 8,996 (23)                  | 0.00                       | 8,575 (23)                 | 8,996 (23)                  | 0.00                       |
| 2018                          | 22,869 (22)                 | 9,886 (25)                  | 0.09                       | 9,421 (25)                 | 9,886 (25)                  | 0.00                       |
| 2019                          | 15,624 (15)                 | 9,538 (25)                  | 0.25                       | 9,074 (24)                 | 9,538 (25)                  | 0.01                       |
| Long-term care status No. (%) | 3,560 (3)                   | 283 (1)                     | 0.19                       | 302 (1)                    | 283 (1)                     | 0.01                       |
| Prescriber, No. (%)           |                             |                             |                            |                            |                             |                            |
| Cardiology                    | 440 (0)                     | 1580 (4)                    | 0.25                       | 636 (2)                    | 1,580 (4)                   | 0.14                       |
| Endocrinology                 | 8,743 (8)                   | 5,480 (14)                  | 0.18                       | 5,068 (14)                 | 5,480 (14)                  | 0.02                       |
| General Practitioner          | 85,858 (81)                 | 26,190 (6)                  | 0.32                       | 26,398 (71)                | 26,190 (67)                 | 0.07                       |
| Internal Medicine             | 3,579 (3)                   | 2652 (7)                    | 0.16                       | 2,421 (7)                  | 2652 (7)                    | 0.01                       |
| Nephrology                    | 803 (1)                     | 758 (2)                     | 0.10                       | 612 (2)                    | 758 (2)                     | 0.02                       |
| Other                         | 6,277 (6)                   | 2,334 (6)                   | 0.00                       | 2,313 (6)                  | 2,334 (6)                   | 0.01                       |
| <b>Comorbidities, No. (%)</b> |                             |                             |                            |                            |                             |                            |

|                                                           |             |             |      |             |             |      |
|-----------------------------------------------------------|-------------|-------------|------|-------------|-------------|------|
| Mean Charlson comorbidity index (SD)                      | 0.5 (1.2)   | 0.4 (1.1)   | 0.05 | 0.4 (0.7)   | 0.4 (1.1)   | 0.02 |
| Mean duration of diabetes, y (SD)                         | 11.5 (7.4)  | 12.4 (7.6)  | 0.11 | 12.2 (4.4)  | 12.4 (7.6)  | 0.03 |
| Fragility fracture                                        | 4,012 (4)   | 1,204 (3)   | 0.04 | 1,197 (3)   | 1,204 (3)   | 0.01 |
| Previous fall                                             | 17,225 (16) | 5,572 (14)  | 0.06 | 5,439 (15)  | 5,572 (14)  | 0.01 |
| Major cancer                                              | 13,220 (13) | 4,290 (11)  | 0.05 | 4,153 (11)  | 4,290 (11)  | 0.00 |
| Dementia                                                  | 7,636 (7)   | 1,094 (3)   | 0.20 | 1,111 (3)   | 1,094 (3)   | 0.01 |
| Rheumatoid arthritis                                      | 2,398 (2)   | 848 (2)     | 0.01 | 815 (2)     | 848 (2)     | 0.00 |
| Osteoporosis                                              | 7,839 (7)   | 1,969 (5)   | 0.10 | 1,926 (5)   | 1,969 (5)   | 0.00 |
| Hypertension                                              | 85,593 (81) | 31,941 (82) | 0.02 | 30,500 (81) | 31,941 (82) | 0.01 |
| Hypotension                                               | 1,802 (2)   | 497 (1)     | 0.03 | 472 (1)     | 497 (1)     | 0.00 |
| Coronary artery disease (excluding angina)                | 24,571 (23) | 12,258 (31) | 0.18 | 10,961 (29) | 12,258 (31) | 0.05 |
| Arrhythmia                                                | 8,612 (8)   | 3,355 (9)   | 0.02 | 3,047 (8)   | 3,355 (9)   | 0.02 |
| Diabetic retinopathy                                      | 750 (1)     | 338 (1)     | 0.02 | 314 (1)     | 338 (1)     | 0.01 |
| Diabetic neuropathy                                       | 1,431 (1)   | 604 (2)     | 0.01 | 577 (2)     | 604 (2)     | 0.00 |
| Hypoglycemia                                              | 2,387 (2)   | 805 (2)     | 0.01 | 756 (2)     | 805 (2)     | 0.01 |
| Peripheral vascular disease                               | 1,196 (1)   | 487 (1)     | 0.01 | 436 (1)     | 487 (1)     | 0.00 |
| Liver disease                                             | 5,014 (5)   | 1,940 (5)   | 0.01 | 1,862 (5)   | 1,940 (5)   | 0.00 |
| Coronary obstructive pulmonary disease                    | 21,795 (21) | 8,718 (22)  | 0.04 | 8,386 (22)  | 8,718 (22)  | 0.00 |
| Congestive heart failure                                  | 12,300 (12) | 5,093 (13)  | 0.05 | 4,607 (12)  | 5,093 (13)  | 0.02 |
| Hypothyroidism                                            | 1,265 (1)   | 338 (1)     | 0.03 | 330 (1)     | 338 (1)     | 0.00 |
| Disorder of calcium metabolism/dietary calcium deficiency | 379 (0)     | 65 (0)      | 0.04 | 67 (0)      | 65 (0)      | 0.00 |
| Stroke/TIA                                                | 10,153 (10) | 3,089 (8)   | 0.06 | 2,935 (8)   | 3,089 (8)   | 0.00 |
| Syncope                                                   | 1,324 (1)   | 383 (1)     | 0.03 | 377 (1)     | 383 (1)     | 0.00 |
| Alcohol misuse                                            | 624 (1)     | 234 (1)     | 0.00 | 223 (1)     | 234 (1)     | 0.00 |
| <b>Medication Use, No. (%)</b>                            |             |             |      |             |             |      |
| Mean number of Unique Drug Names (SD)                     | 6.9 (4.5)   | 7.6 (4.2)   | 0.18 | 7.6 (2.7)   | 7.6 (4.2)   | 0.02 |
| Bisphosphonates                                           | 9,199 (9)   | 1,952 (5)   | 0.15 | 1,939 (5)   | 1,952 (5)   | 0.01 |

|                                                |              |             |      |             |             |      |
|------------------------------------------------|--------------|-------------|------|-------------|-------------|------|
| Denosumab                                      | 2,053 (2)    | 486 (1)     | 0.06 | 479 (1)     | 486 (1)     | 0.01 |
| Oral steroid                                   | 8,038 (8)    | 2,732 (7)   | 0.02 | 2,641 (7)   | 2,732 (7)   | 0.00 |
| Estrogen                                       | 2,099 (2)    | 802 (2)     | 0.01 | 814 (2)     | 802 (2)     | 0.01 |
| Thiazolidinedione                              | 466 (0)      | 144 (0)     | 0.00 | 146 (0)     | 144 (0)     | 0.00 |
| Proton pump inhibitors                         | 28,426 (27)  | 11,396 (29) | 0.05 | 10,895 (29) | 11,396 (29) | 0.00 |
| Loop diuretics                                 | 9,830 (9)    | 4,049 (10)  | 0.04 | 3,701 (10)  | 4,049 (10)  | 0.02 |
| Potassium-sparing diuretics                    | 3,673 (4)    | 1,872 (5)   | 0.07 | 1671 (5)    | 1,872 (5)   | 0.01 |
| Thiazide diuretics                             | 13,960 (13)  | 6,183 (16)  | 0.08 | 5,935 (16)  | 6,183 (16)  | 0.00 |
| Beta blockers                                  | 28,903 (27)  | 13,662 (35) | 0.17 | 12,554 (34) | 13,662 (35) | 0.03 |
| Opiates                                        | 11,846 (11)  | 4,571 (12)  | 0.02 | 4,434 (12)  | 4,571 (12)  | 0.00 |
| Antidepressants                                | 17,489 (17)  | 6,965 (18)  | 0.04 | 6,758 (18)  | 6,965 (18)  | 0.00 |
| Antipsychotics                                 | 3,285 (3)    | 874 (2)     | 0.06 | 890 (2)     | 874 (2)     | 0.01 |
| Testosterone                                   | 352 (0)      | 216 (1)     | 0.04 | 204 (1)     | 216 (1)     | 0.01 |
| Number of unique oral hypoglycemic agents used |              |             |      |             |             |      |
| 0                                              | 37,006 (35)  | 10,916 (28) | 0.15 | 10,454 (28) | 10,916 (28) | 0.00 |
| 1                                              | 51,484 (49)  | 20,902 (54) | 0.10 | 19,976 (53) | 20,902 (54) | 0.01 |
| 2+                                             | 17,210 (16)  | 7,176 (18)  | 0.06 | 7,019 (19)  | 7,176 (18)  | 0.01 |
| Acarbose                                       | 502 (1)      | 218 (1)     | 0.01 | 210 (1)     | 218 (1)     | 0.00 |
| Gliclazide                                     | 20,070 (19)  | 8,082 (21)  | 0.04 | 7,927 (21)  | 8,082 (21)  | 0.01 |
| Glyburide                                      | 3,905 (4)    | 1,105 (3)   | 0.05 | 1,115 (3)   | 1,105 (3)   | 0.01 |
| Metformin                                      | 61,485 (58)  | 25,896 (66) | 0.17 | 24,803 (66) | 25,896 (66) | 0.00 |
| <b>Health care utilization, No. (%)</b>        |              |             |      |             |             |      |
| General practitioner visits                    | 103,120 (98) | 37,951 (97) | 0.02 | 36,397 (97) | 37,951 (97) | 0.01 |
| Mean number of visits (SD)                     | 14.2 (19.2)  | 12.4 (15.0) | 0.11 | 12.4 (8.2)  | 12.4 (15.0) | 0.01 |
| Nephrologist visit                             | 7,743 (7)    | 2,426 (6)   | 0.04 | 2,216 (6)   | 2,426 (6)   | 0.01 |
| Mean number of visits (SD)                     | 0.18 (1.2)   | 0.13 (0.7)  | 0.05 | 0.13 (0.52) | 0.13 (0.7)  | 0.00 |
| Orthopedist visit                              | 10,378 (10)  | 4,060 (10)  | 0.02 | 3,944 (11)  | 4,060 (10)  | 0.00 |

|                                                       |             |             |      |             |             |      |
|-------------------------------------------------------|-------------|-------------|------|-------------|-------------|------|
| Mean number of visits (SD)                            | 0.5 (3.1)   | 0.5 (2.5)   | 0.01 | 0.5 (1.8)   | 0.5 (2.5)   | 0.01 |
| Endocrinologist visit                                 | 12,998 (12) | 7,112 (18)  | 0.16 | 6,499 (17)  | 7,112 (18)  | 0.02 |
| Mean number of visits (SD)                            | 0.5 (2.0)   | 0.8 (2.2)   | 0.13 | 0.7 (1.2)   | 0.8 (2.2)   | 0.06 |
| Internist visit                                       | 31,277 (30) | 11,993 (31) | 0.03 | 11,386 (30) | 11,993 (31) | 0.01 |
| Mean number of visits (SD)                            | 2.3 (8.02)  | 1.9 (5.5)   | 0.05 | 2.0 (3.74)  | 1.9 (5.5)   | 0.02 |
| Geriatrician visit                                    | 3,980 (4)   | 759 (2)     | 0.11 | 732 (2)     | 759 (2)     | 0.01 |
| Mean number of visits (SD)                            | 0.2 (2.4)   | 0.1 (1.1)   | 0.08 | 0.1 (0.8)   | 0.1 (1.1)   | 0.01 |
| Ophthalmologist visit                                 | 32,083 (30) | 12,550 (32) | 0.04 | 11,957 (32) | 12,550 (32) | 0.01 |
| Mean number of visits (SD)                            | 2.2 (5.9)   | 2.53 (6.6)  | 0.05 | 2.46 (3.8)  | 2.53 (6.6)  | 0.01 |
| Episodes of care                                      | 15,087 (14) | 4,770 (12)  | 0.06 | 4,455 (12)  | 4,770 (12)  | 0.01 |
| Mean number of visits (SD)                            | 0.2 (0.58)  | 0.16 (0.49) | 0.07 | 0.16 (0.3)  | 0.16 (0.49) | 0.00 |
| Emergency Room visits                                 | 35,140 (33) | 12,514 (32) | 0.02 | 11,961 (32) | 12,514 (32) | 0.00 |
| Mean number of visits (SD)                            | 0.7 (1.4)   | 0.6 (1.3)   | 0.04 | 0.6 (0.8)   | 0.6 (1.3)   | 0.02 |
| <b>Laboratory Testing No. (%)</b>                     |             |             |      |             |             |      |
| Diabetes management                                   | 54,022 (51) | 22,108 (57) | 0.11 | 21,383 (57) | 22,108 (57) | 0.01 |
| Mean Hemoglobin A1c (SD)                              | 8.1 (1.6)   | 8.0 (1.5)   | 0.03 | 8.1 (0.9)   | 8.0 (1.5)   | 0.02 |
| Missing Hemoglobin A1c                                | 3,097 (3)   | 702 (2)     | 0.07 | 844 (2)     | 702 (2)     | 0.04 |
| Mean Urine Albumin to Creatinine ratio (SD)           | 11.6 (42.2) | 11.8 (41.4) | 0.01 | 11.3 (25.8) | 11.8 (41.4) | 0.02 |
| Missing Urine Albumin to Creatinine ratio             | 31,502 (30) | 9,683 (25)  | 0.11 | 9,370 (25)  | 9,683 (25)  | 0.00 |
| Mean number of laboratory serum creatinine tests (SD) | 4.1 (5.6)   | 3.8 (4.0)   | 0.06 | 3.8 (2.5)   | 3.8 (4.0)   | 0.01 |
| Mean eGFR (SD)                                        | 69 (19)     | 73 (17)     | 0.23 | 73 (10)     | 73 (17)     | 0.01 |
| eGFR                                                  |             |             |      |             |             |      |
| ≥90                                                   | 14,853 (14) | 6,485 (17)  | 0.07 | 6,319 (17)  | 6,485 (17)  | 0.01 |
| 60-<90                                                | 55,500 (53) | 23,520 (60) | 0.16 | 22,547 (60) | 23,520 (60) | 0.00 |
| 45-<60                                                | 20,617 (20) | 6,577 (17)  | 0.07 | 6,250 (17)  | 6,577 (17)  | 0.01 |
| 30-<45                                                | 14,730 (14) | 2,412 (6)   | 0.26 | 2,332 (6)   | 2,412 (6)   | 0.00 |
| Laboratory calcium test                               | 26,012 (25) | 7,798 (20)  | 0.11 | 7,414 (20)  | 7,798 (20)  | 0.01 |

|                                   |             |             |      |             |             |      |
|-----------------------------------|-------------|-------------|------|-------------|-------------|------|
| Mean number of tests (SD)         | 0.6 (1.9)   | 0.4 (1.4)   | 0.11 | 0.4 (0.9)   | 0.4 (1.4)   | 0.03 |
| <b>Diagnostic Imaging No. (%)</b> |             |             |      |             |             |      |
| CT scan                           | 22,582 (21) | 7,271 (19)  | 0.07 | 6,952 (19)  | 7,271 (19)  | 0.00 |
| Carotid ultrasound                | 4,598 (4)   | 1,789 (5)   | 0.01 | 1,656 (4)   | 1,789 (5)   | 0.01 |
| Echocardiography                  | 21,789 (21) | 9,545 (25)  | 0.09 | 8,573 (23)  | 9,545 (25)  | 0.04 |
| Cardiac stress test               | 12,626 (12) | 6,419 (17)  | 0.13 | 5,753 (15)  | 6,419 (17)  | 0.03 |
| Bone mineral density test         | 6,743 (6)   | 2,109 (5)   | 0.04 | 2,062 (6)   | 2,109 (5)   | 0.00 |
| Chest x-ray                       | 32,516 (31) | 11,218 (29) | 0.04 | 10,593 (28) | 11,218 (29) | 0.01 |
| Pulmonary function test           | 7,451 (7)   | 3,504 (9)   | 0.07 | 3,221 (9)   | 3,504 (9)   | 0.01 |

**Supplemental Appendix H- Full baseline characteristics for the weighted and unweighted cohorts**

Abbreviations: DPP-4i- Dipeptidyl peptidase 4 inhibitor, SGLT-2i- Sodium glucose 2 transporter inhibitor, SD: standard deviation, TIA- Transient ischemic attack, Charlson comorbidity score was calculated using five years of hospitalization data. "No hospitalizations" received a score of 0.



|                               | eGFR ≥90 (N=12,814)   |                        |          | eGFR 60 - <90 (N=46,145) |                         |          | eGFR 45 - <60 (N=12,777) |                        |          | eGFR 30 - <45 (N=4,617) |                        |          |
|-------------------------------|-----------------------|------------------------|----------|--------------------------|-------------------------|----------|--------------------------|------------------------|----------|-------------------------|------------------------|----------|
|                               | DPP4i users (N=6,329) | SGLT2i users (N=6,485) | Std Diff | DPP4i users (N=22,625)   | SGLT2i users (N=23,520) | Std Diff | DPP4i users (N=6,200)    | SGLT2i users (N=6,577) | Std Diff | DPP4i users (N=2,205)   | SGLT2i users (N=2,412) | Std Diff |
| <b>Demographics</b>           |                       |                        |          |                          |                         |          |                          |                        |          |                         |                        |          |
| Age, mean, y (SD)             | 69 (2)                | 69 (3)                 | 0.00     | 72 (3)                   | 72 (5)                  | 0.01     | 74 (3)                   | 74 (6)                 | 0.00     | 76 (3)                  | 76 (6)                 | 0.02     |
| Female No. (%)                | 2,744 (43)            | 2,745 (42)             | 0.02     | 8,878 (39)               | 8,964 (38)              | 0.02     | 2,594 (42)               | 2,659 (40)             | 0.03     | 1,020 (46)              | 1,089 (45)             | 0.02     |
| Income quintile No. (%)       |                       |                        |          |                          |                         |          |                          |                        |          |                         |                        |          |
| 1                             | 1,413 (22)            | 1,410 (22)             | 0.01     | 4,799 (21)               | 4,926 (21)              | 0.01     | 1,329 (21)               | 1,372 (21)             | 0.01     | 511 (23)                | 549 (23)               | 0.01     |
| 2                             | 1,381 (22)            | 1,417 (22)             | 0.00     | 4,818 (21)               | 5,024 (21)              | 0.00     | 1,335 (22)               | 1,414 (22)             | 0.00     | 485 (22)                | 528 (22)               | 0.00     |
| 3                             | 1,295 (21)            | 1,336 (21)             | 0.00     | 4,790 (21)               | 4,947 (21)              | 0.00     | 1,264 (20)               | 1,341 (20)             | 0.00     | 450 (20)                | 485 (20)               | 0.01     |
| 4                             | 1,185 (19)            | 1,224 (19)             | 0.01     | 4,225 (19)               | 4,441 (19)              | 0.01     | 1,184 (19)               | 1,275 (19)             | 0.01     | 408 (19)                | 465 (19)               | 0.02     |
| 5                             | 1,057 (17)            | 1,098 (17)             | 0.01     | 3,992 (18)               | 4,182 (18)              | 0.01     | 1,086 (18)               | 1,175 (18)             | 0.01     | 352 (16)                | 385 (16)               | 0.00     |
| Rurality No. (%)              | 1,136 (18)            | 1,177 (18)             | 0.01     | 3,545 (16)               | 3,655 (16)              | 0.01     | 925 (15)                 | 975 (15)               | 0.00     | 331 (15)                | 360 (15)               | 0.00     |
| Index year No. (%)            |                       |                        |          |                          |                         |          |                          |                        |          |                         |                        |          |
| 2015                          | 753 (12)              | 785 (12)               | 0.01     | 2,266 (10)               | 2,300 (10)              | 0.01     | 545 (9)                  | 543 (8)                | 0.02     | 144 (7)                 | 142 (6)                | 0.02     |
| 2016                          | 1,437 (23)            | 1,457 (23)             | 0.00     | 4,101 (18)               | 4,157 (18)              | 0.01     | 913 (15)                 | 934 (14)               | 0.01     | 254 (12)                | 256 (11)               | 0.03     |
| 2017                          | 1,366 (22)            | 1,396 (22)             | 0.00     | 5,456 (24)               | 5,712 (24)              | 0.00     | 1,389 (22)               | 1,468 (22)             | 0.00     | 404 (18)                | 420 (17)               | 0.02     |
| 2018                          | 1,434 (23)            | 1,482 (23)             | 0.00     | 5,737 (25)               | 6,003 (26)              | 0.00     | 1,667 (27)               | 1,783 (27)             | 0.00     | 579 (26)                | 618 (26)               | 0.02     |
| 2019                          | 1,339 (21)            | 1,365 (21)             | 0.00     | 5,065 (22)               | 5,348 (23)              | 0.01     | 1,684 (27)               | 1,849 (28)             | 0.02     | 824 (37)                | 976 (41)               | 0.07     |
| Long-term care status No. (%) | 42 (1)                | 37 (1)                 | 0.01     | 167 (1)                  | 154 (1)                 | 0.00     | 64 (1)                   | 60 (1)                 | 0.01     | 33 (2)                  | 32 (1)                 | 0.02     |
| Prescriber No. (%)            |                       |                        |          |                          |                         |          |                          |                        |          |                         |                        |          |
| Cardiology                    | 79 (1)                | 140 (2)                | 0.07     | 366 (2)                  | 931 (4)                 | 0.15     | 128 (2%)                 | 362 (6)                | 0.18     | 55 (3)                  | 147 (6)                | 0.18     |
| Endocrinology                 | 831 (13)              | 893 (14)               | 0.02     | 3,074 (14)               | 3,333 (14)              | 0.02     | 902 (15)                 | 957 (15)               | 0.00     | 282 (13)                | 297 (12)               | 0.02     |
| General Practitioner          | 4,603 (73)            | 4,597 (71)             | 0.04     | 16,323 (72)              | 16,216 (69)             | 0.07     | 4,136 (67)               | 4,097 (62)             | 0.09     | 1,295 (59)              | 1,280 (53)             | 0.11     |
| Internal Medicine             | 337 (5)               | 361 (6)                | 0.01     | 1342 (6)                 | 1476 (6)                | 0.02     | 514 (8)                  | 576 (9)                | 0.02     | 218 (10)                | 239 (10)               | 0.00     |

|                                            |            |            |      |             |             |      |            |            |      |            |            |      |
|--------------------------------------------|------------|------------|------|-------------|-------------|------|------------|------------|------|------------|------------|------|
| Nephrology                                 | 25 (%)     | 38 (1)     | 0.03 | 127 (1)     | 168 (1)     | 0.01 | 173 (3)    | 235 (4)    | 0.05 | 226 (10)   | 317 (13)   | 0.09 |
| Other                                      | 455 (7)    | 456 (7)    | 0.01 | 1394 (6)    | 1,396 (6)   | 0.01 | 344 (6)    | 350 (5)    | 0.01 | 130 (6)    | 132 (6)    | 0.02 |
| <b>Comorbidities No. (%)</b>               |            |            |      |             |             |      |            |            |      |            |            |      |
| Mean Charlson comorbidity index (SD)       | 0.3 (0.7)  | 0.4 (1.0)  | 0.01 | 0.4 (0.7)   | 0.4 (1.0)   | 0.02 | 0.6 (0.7)  | 0.6 (1.2)  | 0.02 | 0.8 (0.6)  | 0.8 (1.4)  | 0.00 |
| Mean duration of diabetes, y (SD)          | 11.2 (4.6) | 11.4 (7.2) | 0.02 | 11.9 (4.7)  | 12.1 (7.5)  | 0.03 | 13.4 (4.2) | 13.5 (7.9) | 0.02 | 15.1 (3.0) | 15.3 (7.9) | 0.03 |
| Fragility fracture                         | 207 (3)    | 206 (3)    | 0.01 | 672 (3)     | 678 (3)     | 0.01 | 228 (4)    | 228 (4)    | 0.01 | 85 (4)     | 92 (4)     | 0.01 |
| Previous fall                              | 885 (14)   | 907 (14)   | 0.00 | 3,139 (14)  | 3,207 (14)  | 0.01 | 1,000 (16) | 1,029 (16) | 0.01 | 397 (18)   | 429 (18)   | 0.01 |
| Major cancer                               | 619 (10)   | 642 (10)   | 0.00 | 2,520 (11)  | 2584 (11)   | 0.00 | 714 (12)   | 744 (11)   | 0.01 | 296 (13)   | 320 (13)   | 0.00 |
| Dementia                                   | 94 (2)     | 90 (1)     | 0.01 | 653 (3)     | 635 (3)     | 0.01 | 258 (4)    | 255 (4)    | 0.02 | 108 (5)    | 114 (5)    | 0.01 |
| Rheumatoid arthritis                       | 145 (2)    | 150 (2)    | 0.00 | 469 (2)     | 489 (2)     | 0.00 | 147 (2)    | 151 (2)    | 0.01 | 52 (2)     | 58 (2)     | 0.00 |
| Osteoporosis                               | 334 (5)    | 338 (5)    | 0.00 | 1,178 (5)   | 1,189 (5)   | 0.00 | 307 (5)    | 321 (5)    | 0.00 | 112 (5)    | 121 (5)    | 0.00 |
| Hypertension                               | 4,728 (75) | 4,859 (75) | 0.00 | 18,237 (81) | 19,058 (81) | 0.01 | 5,422 (88) | 5,783 (88) | 0.01 | 2,035 (92) | 2,241 (93) | 0.03 |
| Hypotension                                | 47 (1)     | 50 (1)     | 0.01 | 233 (1)     | 236 (1)     | 0.00 | 122 (2)    | 144 (2)    | 0.01 | 66 (3)     | 67 (3)     | 0.01 |
| Coronary artery disease (excluding angina) | 1,376 (22) | 1,512 (23) | 0.04 | 6,543 (29)  | 7,317 (31)  | 0.05 | 2,151 (35) | 2,445 (37) | 0.05 | 853 (39)   | 984 (41)   | 0.04 |
| Arrhythmia                                 | 292 (5)    | 310 (5)    | 0.01 | 1,664 (7)   | 1,831 (8)   | 0.02 | 736 (12)   | 829 (13)   | 0.02 | 334 (15)   | 385 (16)   | 0.02 |
| Diabetic retinopathy                       | 34 (1)     | 36 (1)     | 0.01 | 174 (1)     | 181 (1)     | 0.00 | 67 (1)     | 77 (1)     | 0.01 | 37 (2)     | 44 (2)     | 0.01 |
| Diabetic neuropathy                        | 79 (1)     | 82 (1)     | 0.01 | 310 (1)     | 325 (1)     | 0.00 | 125 (2)    | 141 (2)    | 0.01 | 55 (3)     | 56 (2)     | 0.01 |
| Hypoglycemia                               | 89 (1)     | 90 (1)     | 0.00 | 367 (2)     | 392 (2)     | 0.01 | 197 (3)    | 213 (3)    | 0.00 | 104 (5)    | 110 (5)    | 0.00 |
| Peripheral vascular disease                | 57 (1)     | 66 (1)     | 0.01 | 243 (1)     | 279 (1)     | 0.01 | 87 (1)     | 96 (2)     | 0.01 | 45 (2)     | 46 (2)     | 0.01 |
| Liver disease                              | 386 (6)    | 391 (6)    | 0.00 | 1,069 (5)   | 1113 (5)    | 0.00 | 276 (4)    | 300 (5)    | 0.01 | 120 (5)    | 136 (6)    | 0.01 |
| Coronary Obstructive Pulmonary Disease     | 1,358 (21) | 1,373 (21) | 0.00 | 4,908 (22)  | 5,081 (22)  | 0.00 | 1,539 (25) | 1,633 (25) | 0.00 | 577 (26)   | 631 (26)   | 0.00 |



|                                         |            |             |      |             |             |      |            |             |      |            |             |      |
|-----------------------------------------|------------|-------------|------|-------------|-------------|------|------------|-------------|------|------------|-------------|------|
| 0                                       | 1,622 (26) | 1,661 (26)  | 0.00 | 6,199 (27)  | 6,472 (28)  | 0.00 | 1,785 (29) | 1,909 (29)  | 0.00 | 790 (36)   | 874 (36)    | 0.01 |
| 1                                       | 3,407 (54) | 3,528 (54)  | 0.01 | 12,187 (54) | 12,729 (54) | 0.00 | 3,281 (53) | 3,490 (53)  | 0.00 | 1,058 (48) | 1,155 (48)  | 0.00 |
| 2+                                      | 1,301 (21) | 1,296 (20)  | 0.01 | 4,239 (19)  | 4,319 (18)  | 0.01 | 1,132 (18) | 1,178 (18)  | 0.01 | 358 (16)   | 383 (16)    | 0.01 |
| Acarbose                                | 31 (1)     | 29 (0)      | 0.01 | 131 (1)     | 138 (1)     | 0.00 | 35 (1)     | 36 (1)      | 0.01 | 15 (1)     | 15 (1)      | 0.01 |
| Gliclazide                              | 1,377 (22) | 1,383 (21)  | 0.01 | 4,771 (21)  | 4,837 (21)  | 0.01 | 1,340 (22) | 1,373 (21)  | 0.02 | 458 (21)   | 489 (20)    | 0.01 |
| Glyburide                               | 202 (3)    | 198 (3)     | 0.01 | 652 (3)     | 641 (3)     | 0.01 | 207 (3)    | 207 (3)     | 0.01 | 59 (3)     | 59 (2)      | 0.02 |
| Metformin                               | 4,406 (70) | 4,516 (70)  | 0.00 | 15,143 (67) | 15,783 (67) | 0.00 | 3,963 (64) | 4,233 (64)  | 0.01 | 1,248 (57) | 1,364 (57)  | 0.00 |
| <b>Health Care Utilization, No. (%)</b> |            |             |      |             |             |      |            |             |      |            |             |      |
| General Practitioner visits             | 6,129 (97) | 6,297 (97)  | 0.02 | 21,997 (97) | 22,883 (97) | 0.01 | 6,034 (97) | 6,429 (98)  | 0.02 | 2,151 (98) | 2,342 (97)  | 0.02 |
| Mean number of visits (SD)              | 11.9 (8.4) | 11.6 (15.7) | 0.02 | 12.1 (8.5)  | 12.1 (14.3) | 0.01 | 13.4 (8.4) | 13.4 (15.9) | 0.00 | 14.5 (6.2) | 14.4 (15.9) | 0.01 |
| Nephrologist visit                      | 154 (2)    | 178 (3)     | 0.02 | 703 (3)     | 759 (3)     | 0.01 | 662 (11)   | 738 (11)    | 0.02 | 637 (29)   | 751 (31)    | 0.05 |
| Mean number of visits (SD)              | 0.0 (0.3)  | 0.1 (0.4)   | 0.03 | 0.1 (0.4)   | 0.1 (0.5)   | 0.00 | 0.2 (0.7)  | 0.2 (0.9)   | 0.03 | 0.7 (0.9)  | 0.7 (1.5)   | 0.03 |
| Orthopedist visit                       | 689 (11)   | 689 (11)    | 0.01 | 2,332 (10)  | 2,392 (10)  | 0.00 | 669 (11)   | 711 (11)    | 0.00 | 238 (11)   | 268 (11)    | 0.01 |
| Mean number of visits (SD)              | 0.6 (2.3)  | 0.5 (2.3)   | 0.03 | 0.5 (1.6)   | 0.5 (2.6)   | 0.01 | 0.5 (2.2)  | 0.5 (2.3)   | 0.01 | 0.6 (1.0)  | 0.5 (2.1)   | 0.03 |
| Endocrinologist visit                   | 1,035 (16) | 1,117 (17)  | 0.02 | 3,844 (17)  | 4,201 (18)  | 0.02 | 1,206 (20) | 1,317 (20)  | 0.01 | 419 (19)   | 477 (20)    | 0.02 |
| Mean number of visits (SD)              | 0.6 (1.2)  | 0.8 (2.2)   | 0.07 | 0.7 (1.3)   | 0.8 (2.1)   | 0.05 | 0.8 (1.2)  | 0.9 (2.4)   | 0.04 | 0.8 (1.0)  | 1.0 (2.5)   | 0.08 |
| Internist visit                         | 1,698 (27) | 1,760 (27)  | 0.01 | 6,640 (29)  | 6,962 (30)  | 0.01 | 2,155 (35) | 2,329 (35)  | 0.01 | 866 (39)   | 942 (39)    | 0.00 |
| Mean number of visits (SD)              | 1.6 (4.0)  | 1.5 (4.3)   | 0.02 | 1.9 (3.8)   | 1.7 (5.4)   | 0.03 | 2.5 (4.4)  | 2.4 (6.2)   | 0.02 | 3.3 (3.7)  | 2.9 (6.8)   | 0.08 |
| Geriatrician visit                      | 78 (1)     | 79 (1)      | 0.00 | 424 (2)     | 437 (2)     | 0.00 | 157 (3)    | 166 (3)     | 0.00 | 71 (3)     | 77 (3)      | 0.00 |
| Mean number of visits (SD)              | 0.1 (0.6)  | 0.1 (1.0)   | 0.00 | 0.1 (0.9)   | 0.1 (1.0)   | 0.01 | 0.1 (0.8)  | 0.1 (1.1)   | 0.02 | 0.2 (0.7)  | 0.2 (1.7)   | 0.01 |
| Ophthalmologist visit                   | 1,755 (28) | 1,811 (28)  | 0.00 | 7,154 (32)  | 7,500 (32)  | 0.01 | 2,133 (34) | 2,284 (35)  | 0.01 | 864 (39)   | 955 (40)    | 0.01 |
| Mean number of visits (SD)              | 2.0 (3.6)  | 2.0 (5.7)   | 0.00 | 2.4 (4.1)   | 2.5 (6.4)   | 0.01 | 2.7 (3.7)  | 2.9 (7.2)   | 0.04 | 3.3 (2.8)  | 3.6 (8.6)   | 0.05 |
| Episodes of care                        | 689 (11)   | 716 (11)    | 0.00 | 2462 (11)   | 2629 (11)   | 0.01 | 883 (14)   | 977 (15)    | 0.02 | 415 (19)   | 448 (19)    | 0.01 |

|                                                       |            |             |      |             |             |      |             |             |      |             |             |      |
|-------------------------------------------------------|------------|-------------|------|-------------|-------------|------|-------------|-------------|------|-------------|-------------|------|
| Mean number of visits (SD)                            | 0.1 (0.3)  | 0.1 (0.4)   | 0.00 | 0.1 (0.3)   | 0.1 (0.5)   | 0.00 | 0.2 (0.3)   | 0.2 (0.6)   | 0.02 | 0.3 (0.3)   | 0.3 (0.7)   | 0.02 |
| Emergency room visits                                 | 1,911 (30) | 1,979 (31)  | 0.01 | 6,907 (31)  | 7,201 (31)  | 0.00 | 2,199 (36)  | 2,341 (36)  | 0.00 | 920 (42)    | 993 (41)    | 0.01 |
| Mean number of visits (SD)                            | 0.6 (0.92) | 0.56 (1.18) | 0.04 | 0.59 (0.88) | 0.57 (1.27) | 0.02 | 0.74 (0.83) | 0.71 (1.39) | 0.03 | 0.89 (0.61) | 0.86 (1.63) | 0.02 |
| <b>Laboratory Testing No. (%)</b>                     |            |             |      |             |             |      |             |             |      |             |             |      |
| Diabetes management                                   | 3,594 (57) | 3,645 (56)  | 0.01 | 13,056 (58) | 13,480 (57) | 0.01 | 3,505 (57)  | 3,699 (56)  | 0.01 | 1,192 (54)  | 1,284 (53)  | 0.02 |
| Mean Hemoglobin A1C (SD)                              | 8.3 (1.1)  | 8.3 (1.6)   | 0.01 | 8.0 (0.9)   | 8.0 (1.4)   | 0.02 | 8.0 (0.8)   | 7.9 (1.4)   | 0.04 | 8.0 (0.6)   | 7.9 (1.5)   | 0.05 |
| Missing Hemoglobin A1C                                | 158 (3)    | 111 (2)     | 0.06 | 492 (2)     | 386 (2)     | 0.04 | 137 (2)     | 133 (2)     | 0.01 | 52 (2)      | 72 (3)      | 0.04 |
| Mean Urine albumin to creatinine ratio (SD)           | 7.5 (19.4) | 7.8 (26.4)  | 0.01 | 8.3 (20.5)  | 8.7 (32.5)  | 0.02 | 16.5 (30.4) | 17.9 (53.1) | 0.04 | 33.5 (34.8) | 35.4 (82.6) | 0.04 |
| Missing Urine albumin to creatinine ratio             | 1,620 (26) | 1,633 (25)  | 0.01 | 5,669 (25)  | 5,879 (25)  | 0.00 | 1,545 (25)  | 1,633 (25)  | 0.00 | 516 (23)    | 538 (22)    | 0.03 |
| Laboratory calcium test                               | 1,013 (16) | 1,019 (16)  | 0.01 | 3,928 (17)  | 4,107 (18)  | 0.00 | 1,548 (25)  | 1,680 (26)  | 0.01 | 873 (40)    | 992 (41)    | 0.03 |
| Mean number of calcium tests (SD)                     | 0.3 (1.1)  | 0.3 (1.4)   | 0.04 | 0.4 (1.0)   | 0.3 (1.2)   | 0.04 | 0.6 (1.0)   | 0.5 (1.8)   | 0.04 | 0.9 (0.8)   | 0.9 (1.7)   | 0.02 |
| Mean number of laboratory serum creatinine tests (SD) | 3.3 (2.8)  | 3.3 (3.5)   | 0.01 | 3.6 (2.6)   | 3.56 (3.47) | 0.00 | 4.5 (3.0)   | 4.5 (5.0)   | 0.01 | 5.9 (2.7)   | 5.7 (5.7)   | 0.05 |
| Mean eGFR (SD)                                        | 94 (3)     | 94 (4)      | 0.00 | 76 (6)      | 76 (9)      | 0.01 | 53 (2)      | 53 (4)      | 0.00 | 39 (2)      | 39 (4)      | 0.01 |
| <b>Diagnostic Testing No. (%)</b>                     |            |             |      |             |             |      |             |             |      |             |             |      |
| CT scan                                               | 1,046 (17) | 1,076 (17)  | 0.00 | 4,021 (18)  | 4,186 (18)  | 0.00 | 1,336 (22)  | 1,433 (22)  | 0.00 | 534 (24)    | 576 (24)    | 0.01 |
| Carotid ultrasound                                    | 222 (4)    | 232 (4)     | 0.01 | 983 (4)     | 1,062 (5)   | 0.01 | 317 (5)     | 352 (5)     | 0.01 | 136 (6)     | 143 (6)     | 0.01 |
| Echocardiogram                                        | 1,153 (18) | 1,250 (19)  | 0.03 | 4,908 (22)  | 5,462 (23)  | 0.04 | 1,755 (28)  | 1,999 (30)  | 0.05 | 708 (32)    | 834 (35)    | 0.05 |
| Cardiac stress test                                   | 869 (14)   | 944 (15)    | 0.03 | 3,459 (15)  | 3,846 (16)  | 0.03 | 1,052 (17)  | 1,200 (18)  | 0.03 | 352 (16)    | 429 (18)    | 0.05 |

|                           |            |            |      |            |            |      |            |            |      |          |          |      |
|---------------------------|------------|------------|------|------------|------------|------|------------|------------|------|----------|----------|------|
| Bone mineral density test | 366 (6)    | 370 (6)    | 0.00 | 1,251 (6)  | 1262 (5)   | 0.00 | 334 (5)    | 357 (5)    | 0.00 | 113 (5)  | 120 (5)  | 0.00 |
| Chest x-ray               | 1,598 (25) | 1,656 (26) | 0.00 | 6,165 (27) | 6,498 (28) | 0.01 | 1,986 (32) | 2,153 (33) | 0.01 | 827 (38) | 911 (38) | 0.01 |
| Pulmonary function test   | 467 (7)    | 488 (8)    | 0.00 | 1900 (8)   | 2050 (9)   | 0.01 | 644 (10)   | 715 (11)   | 0.02 | 212 (10) | 251 (10) | 0.03 |

**Supplemental Appendix I – Full baseline characteristics, stratified by eGFR category, after weighting**

Abbreviations: DPP-4i- Dipeptidyl peptidase 4 inhibitor, SGLT-2i- Sodium glucose 2 transporter inhibitor, Std Diff- standardized difference, SD: standard deviation, TIA- Transient ischemic attack, Charlson comorbidity score was calculated using five years of hospitalization data. “No hospitalizations” received a score of 0.

| Site of Fracture       | DPP-4i Users<br>N=37,449<br>n (%) | SGLT-2i Users N=3,8994<br>n (%) | HR (95% CI)      |
|------------------------|-----------------------------------|---------------------------------|------------------|
| Hip                    | 36 (0.1%)                         | 30 (0.08%)                      | 0.81 (0.52-1.24) |
| Spine                  | 13 (0.03%)                        | 11 (0.03%)                      | 0.83 (0.39-1.78) |
| Shoulder and Upper Arm | 47 (0.12%)                        | 56 (0.14%)                      | 1.15 (0.82-1.63) |
| Wrist and Forearm      | 59 (0.16%)                        | 57 (0.15%)                      | 0.92 (0.67-1.27) |
| Pelvis                 | 32 (0.09%)                        | 24 (0.06%)                      | 0.72 (0.44-1.17) |

**Supplemental Appendix J- Fracture at 180 days by fracture site**
